# Supplementary material
Source: PubMed Central journal article supplement (PMC5664960)
Supplement: NIHMS844246-supplement-Appendix.pdf [file NIHMS844246-supplement-Appendix.pdf]

## Appendix

**Proposition 1.** Social welfare is higher when the upstream technologies are in the public domain, relative to when they are granted patents, whenever  $SW^{public}$  is larger than  $SW^{ip}$  (where IP denotes “intellectual property”) - that is:

$$\pi \cdot N(\pi \cdot \delta \cdot \Pi^m) \cdot [\delta \cdot SW^m + (1 - \delta) \cdot SW^c] > \pi \cdot N(\pi \cdot \lambda \cdot \Pi^m) \cdot SW^m \quad (10)$$

There exists a value of  $\lambda$ , denoted  $\lambda^*$ , such that social welfare from the upstream technologies being in the public domain is the same as social welfare from the upstream technologies being granted patents. For values  $\lambda < \lambda^*$ , social welfare is strictly higher when the upstream technologies are in the public domain relative to when they are granted patents. For values  $\lambda > \lambda^*$ , social welfare is strictly higher when the upstream technologies are granted patents relative to when they are in the public domain. The value of  $\lambda^*$  is greater than  $\delta$ , and is increasing in  $\delta$  if and only if the elasticity  $\varepsilon$  of the supply of innovators with respect to the level of expected returns (that is,  $\frac{x \cdot N'(x)}{N(x)}$ ) is such that

$$\varepsilon > \frac{\frac{SW^c}{SW^m} - 1}{1 + \frac{1-\delta}{\delta} \cdot \frac{SW^c}{SW^m}} \quad (11)$$

**Proof of Proposition 1.** The function  $N(\cdot)$  is strictly increasing, which implies that social welfare when the upstream technologies have been granted patents is strictly increasing in  $\lambda$ .

At  $\lambda = 0$ , social welfare with patents is  $\pi \cdot N(0) \cdot SW^m$ . Comparing this level of social welfare with  $SW^{public}$ , we see that since  $N(0)$  is strictly less than  $N(\pi \delta \Pi^m)$  and  $SW^m$  is weakly less than  $\delta \cdot SW^m + (1 - \delta) \cdot SW^c$ , at  $\lambda = 0$  granting patents on the upstream technologies is strictly worse than the upstream technologies being in the public domain.

At  $\lambda = 1$ , social welfare with patents is  $\pi \cdot N(\pi \cdot \Pi^m) \cdot SW^m$ . Comparing this level of social welfare with  $SW^{public}$ , we see that in this case social welfare with patents is greater than  $SW^{public}$  if and only if the following condition holds:

$$\frac{N(\pi \Pi^m)}{N(\pi \delta \Pi^m)} > \delta + (1 - \delta) \cdot \frac{SW^c}{SW^m} \quad (12)$$

If Equation (12) holds at  $\lambda = 1$ , then granting patents on the upstream technologies is preferable to the upstream technologies in the public domain.

At  $\lambda = 1$ , Equation (12) implies that granting patents on the upstream technologies is strictly worse than the upstream technologies being in the public domain as long as  $\frac{N(\pi \Pi^m)}{N(\pi \delta \Pi^m)} < \delta + (1 - \delta) \cdot \frac{SW^c}{SW^m}$ . Since social welfare when the upstream technologies have been granted IP is strictly increasing in  $\lambda$ , this implies that for all values of lambda, granting patents on the upstream technologies is strictly worse than the upstream technologies being in the public domain as long as  $\frac{N(\pi \Pi^m)}{N(\pi \delta \Pi^m)} < \delta + (1 - \delta) \cdot \frac{SW^c}{SW^m}$ .

Since social welfare when the upstream technologies have been granted patents is strictly lower than when the upstream technologies are in the public domain at  $\lambda = 0$ , strictly higher at  $\lambda = 1$  when Equation (12) holds, and monotonically increasing in  $\lambda$ , the continuity of  $N(\cdot)$  implies that when Equation (12) holds there exists a value of  $\lambda$  at which social welfare is the same when the upstream technologies have patents as when they are in the public domain.

The value of  $\lambda$  at which social welfare is equal across these two cases, denoted  $\lambda^*$ , is implicitly defined by the following equation:

$$\pi \cdot N(\pi \cdot \delta \cdot \Pi^m) \cdot [\delta \cdot SW^m + (1 - \delta) \cdot SW^c] = \pi \cdot N(\pi \cdot \lambda^* \cdot \Pi^m) \cdot SW^m \quad (13)$$

Which we can re-write as:

$$N(\pi \cdot \lambda^* \cdot \Pi^m) = N(\pi \cdot \delta \cdot \Pi^m) \left[ \delta + (1 - \delta) \cdot \frac{SW^c}{SW^m} \right] \quad (14)$$

Note that the bracketed term,  $\delta + (1 - \delta) \cdot \frac{SW^c}{SW^m}$ , is greater than one, implying  $N(\pi \cdot \delta \cdot \Pi^m) < N(\pi \cdot \lambda^* \cdot \Pi^m)$ , implying  $\delta < \lambda^*$ .

Differentiating both sides of Equation (14) with respect to  $\delta$  gives the following:

$$N'(\pi \cdot \lambda^* \cdot \Pi^m) \cdot \frac{d\lambda^*}{d\delta} \cdot \pi \cdot \Pi^m = N'(\pi \cdot \delta \cdot \Pi^m) \cdot \pi \cdot \Pi^m \cdot \left[ \delta + (1 - \delta) \cdot \frac{SW^c}{SW^m} \right] + N(\pi \cdot \delta \cdot \Pi^m) \cdot \left[ 1 - \frac{SW^c}{SW^m} \right] \quad (15)$$

Which can be re-written as:

$$\frac{d\lambda^*}{d\delta} = \frac{N'(\pi \cdot \delta \cdot \Pi^m) \cdot \pi \cdot \Pi^m \cdot \left[ \delta + (1 - \delta) \cdot \frac{SW^c}{SW^m} \right] + N(\pi \cdot \delta \cdot \Pi^m) \cdot \left[ 1 - \frac{SW^c}{SW^m} \right]}{N'(\pi \cdot \lambda^* \cdot \Pi^m) \cdot \pi \cdot \Pi^m} \quad (16)$$

The denominator on the right hand side of Equation (15) is always positive (since  $N(\cdot)$  is strictly increasing). Thus,  $\frac{d\lambda^*}{d\delta}$  is positive if and only if the numerator on the right hand side of Equation (15) is positive. That is,  $\frac{d\lambda^*}{d\delta}$  is positive if and only if the following condition holds:

$$N'(\pi \cdot \delta \cdot \Pi^m) \cdot \pi \cdot \Pi^m \cdot \left[ \delta + (1 - \delta) \cdot \frac{SW^c}{SW^m} \right] + N(\pi \cdot \delta \cdot \Pi^m) \cdot \left[ 1 - \frac{SW^c}{SW^m} \right] > 0 \quad (17)$$

Define  $\varepsilon$  to be the following, representing the elasticity of the supply of innovators with respect to the level of expected returns:

$$\varepsilon = \frac{N'(\pi \cdot \delta \cdot \Pi^m) \cdot \pi \cdot \delta \cdot \Pi^m}{N(\pi \cdot \delta \cdot \Pi^m)} \quad (18)$$

We can then re-write Equation (17) in terms of  $\varepsilon$  as follows:

$$\varepsilon + \varepsilon \cdot \left[ \frac{1 - \delta}{\delta} \cdot \frac{SW^c}{SW^m} \right] + \left[ 1 - \frac{SW^c}{SW^m} \right] > 0 \quad (19)$$

Equation (17) holds if and only if the following condition holds:

$$\varepsilon > \frac{\frac{SW^c}{SW^m} - 1}{1 + \frac{1 - \delta}{\delta} \cdot \frac{SW^c}{SW^m}} \quad (20)$$

*Q.E.D.*
